# Supplementary material for: Towards a Long-Term Strategy for Voluntary-Based Internal Radiation Contamination Monitoring: A Population-Level Analysis of Monitoring Prevalence and Factors Associated with Monitoring Participation Behavior in Fukushima, Japan
Source: PubMed Central journal article supplement (PMC5409598; doi:10.3390/ijerph14040397), 2017-04-09
Supplement: ijerph-14-00397-s001.pdf [file ijerph-14-00397-s001.pdf]

**Table S1. Multinomial logistic regression model (reference group: non-monitoring) for the factors associated with the WBC monitoring participation behavior (OR, 95% CI). \* p<0.05, \*\* p<0.01, \*\*\* p<0.001 across columns. Participation pattern (I) participated both in 2011–2012 and 2013–2014; (II) participated only in 2011–2012; (III) participated only in 2013–2014; and (IV) participated neither in 2011–2012 nor 2013–2014 (non-participation). Evacuation history (a) evacuated both in 2011–2012 and 2013–2014; (b) evacuated in 2011–2012, but returned to original residential area by 2013–2014; (c) evacuated only during 2013–2014; and (d) evacuated in neither 2011–2012 nor 2013–2014 (non-evacuation).**

|                                                                               | Pattern (I)         | Pattern (II)        | Pattern (III)       |
|-------------------------------------------------------------------------------|---------------------|---------------------|---------------------|
| <b>Age at March 11, 2011</b>                                                  |                     |                     |                     |
| 21–30                                                                         | 1.00                | 1.00                | 1.00                |
| 31–40                                                                         | 1.41 (1.21–1.64)*** | 1.34 (1.22–1.48)*** | 1.18 (1.00–1.40)    |
| 41–50                                                                         | 1.28 (1.10–1.49)**  | 1.16 (1.05–1.28)**  | 1.16 (0.98–1.38)    |
| 51–60                                                                         | 1.56 (1.36–1.80)*** | 1.05 (0.95–1.15)    | 1.95 (1.67–2.28)*** |
| 61–70                                                                         | 2.26 (1.96–2.59)*** | 1.09 (0.99–1.20)    | 2.40 (2.06–2.80)*** |
| 71–80                                                                         | 1.25 (1.07–1.45)**  | 0.71 (0.63–0.78)*** | 1.67 (1.42–1.96)*** |
| 81–                                                                           | 0.29 (0.23–0.36)*** | 0.23 (0.20–0.27)*** | 0.47 (0.37–0.59)*** |
| <b>Gender</b>                                                                 |                     |                     |                     |
| Male                                                                          | 1.00                | 1.00                | 1.00                |
| Female                                                                        | 1.55 (1.45–1.65)*** | 1.47 (1.40–1.54)*** | 1.40 (1.31–1.51)*** |
| <b>Original residential area</b>                                              |                     |                     |                     |
| Outside the evacuation zones                                                  | 1.00                | 1.00                | 1.00                |
| Evacuation Order Zone                                                         | 2.81 (2.40–3.30)*** | 1.86 (1.67–2.07)*** | 1.07 (0.93–1.25)    |
| Emergency Evacuation-Ready Zone                                               | 1.83 (1.65–2.04)*** | 1.44 (1.34–1.55)*** | 1.01 (0.92–1.11)    |
| <b>Evacuation history (beyond <i>Chiku</i>)</b>                               |                     |                     |                     |
| History (a)                                                                   | 0.53 (0.47–0.59)*** | 0.65 (0.60–0.70)*** | 0.90 (0.80–1.00)    |
| History (b)                                                                   | 1.11 (1.02–1.21)*   | 0.99 (0.92–1.06)    | 1.24 (1.13–1.37)*** |
| History (c)                                                                   | 0.90 (0.75–1.08)    | 1.04 (0.91–1.17)    | 1.21 (1.00–1.46)    |
| History (d) (non-evacuation)                                                  | 1.00                | 1.00                | 1.00                |
| Air dose rate [ $\mu$ Sv/h] as of April 22, 2011 at original residential area | 1.16 (1.14–1.19)*** | 1.20 (1.18–1.22)*** | 1.07 (1.04–1.09)*** |

**Table S2. Logistic regression model for the effect of Cs-detection on having the subsequent monitoring participation (OR, 95% CI).** \* p<0.05, \*\* p<0.01, \*\*\* p<0.001. Evacuation history (a) evacuated both in 2011–2012 and 2013–2014; (b) evacuated in 2011–2012, but returned to original residential area by 2013–2014; (c) evacuated only during 2013–2014; and (d) evacuated in neither 2011–2012 nor 2013–2014 (non-evacuation).

|                                                                               |                     |
|-------------------------------------------------------------------------------|---------------------|
| Detection                                                                     |                     |
| No                                                                            | 1.00                |
| Yes                                                                           | 0.96 (0.88–1.06)    |
| Age at March 11, 2011                                                         |                     |
| 21–30                                                                         | 1.00                |
| 31–40                                                                         | 1.06 (0.90–1.25)    |
| 41–50                                                                         | 1.11 (0.94–1.31)    |
| 51–60                                                                         | 1.49 (1.28–1.75)*** |
| 61–70                                                                         | 2.07 (1.78–2.42)*** |
| 71–80                                                                         | 1.77 (1.50–2.10)*** |
| 81–                                                                           | 1.26 (0.97–1.65)    |
| Gender                                                                        |                     |
| Male                                                                          | 1.00                |
| Female                                                                        | 1.07 (1.00–1.16)    |
| Original residential area                                                     |                     |
| Outside the evacuation zones                                                  | 0.66 (0.55–0.79)*** |
| Evacuation Order Zone                                                         |                     |
| Planned Evacuation Zone                                                       | 0.87 (0.08–9.69)    |
| Emergency Evacuation-Ready Zone                                               | 0.81 (0.70–0.93)**  |
| Evacuation history                                                            |                     |
| History (a)                                                                   | 0.79 (0.69–0.91)**  |
| History (b)                                                                   | 1.09 (0.99–1.20)    |
| History (c)                                                                   | 0.90 (0.74–1.10)    |
| History (d) (non-evacuation)                                                  | 1.00                |
| Air dose rate [ $\mu$ Sv/h] as of April 22, 2011 at original residential area | 0.97 (0.95–0.99)**  |
